# Supplementary material for: Shared inflammatory glial cell signature after brain injury, revealed by spatial, temporal and cell-type-specific profiling of the murine cerebral cortex
Source: bioRxiv or medRxiv preprint supplement (doi:10.1101/2023.02.24.529840), 2023-02-27

# Koupourtidou, Schwarz, et. al. ED\_Fig. 1

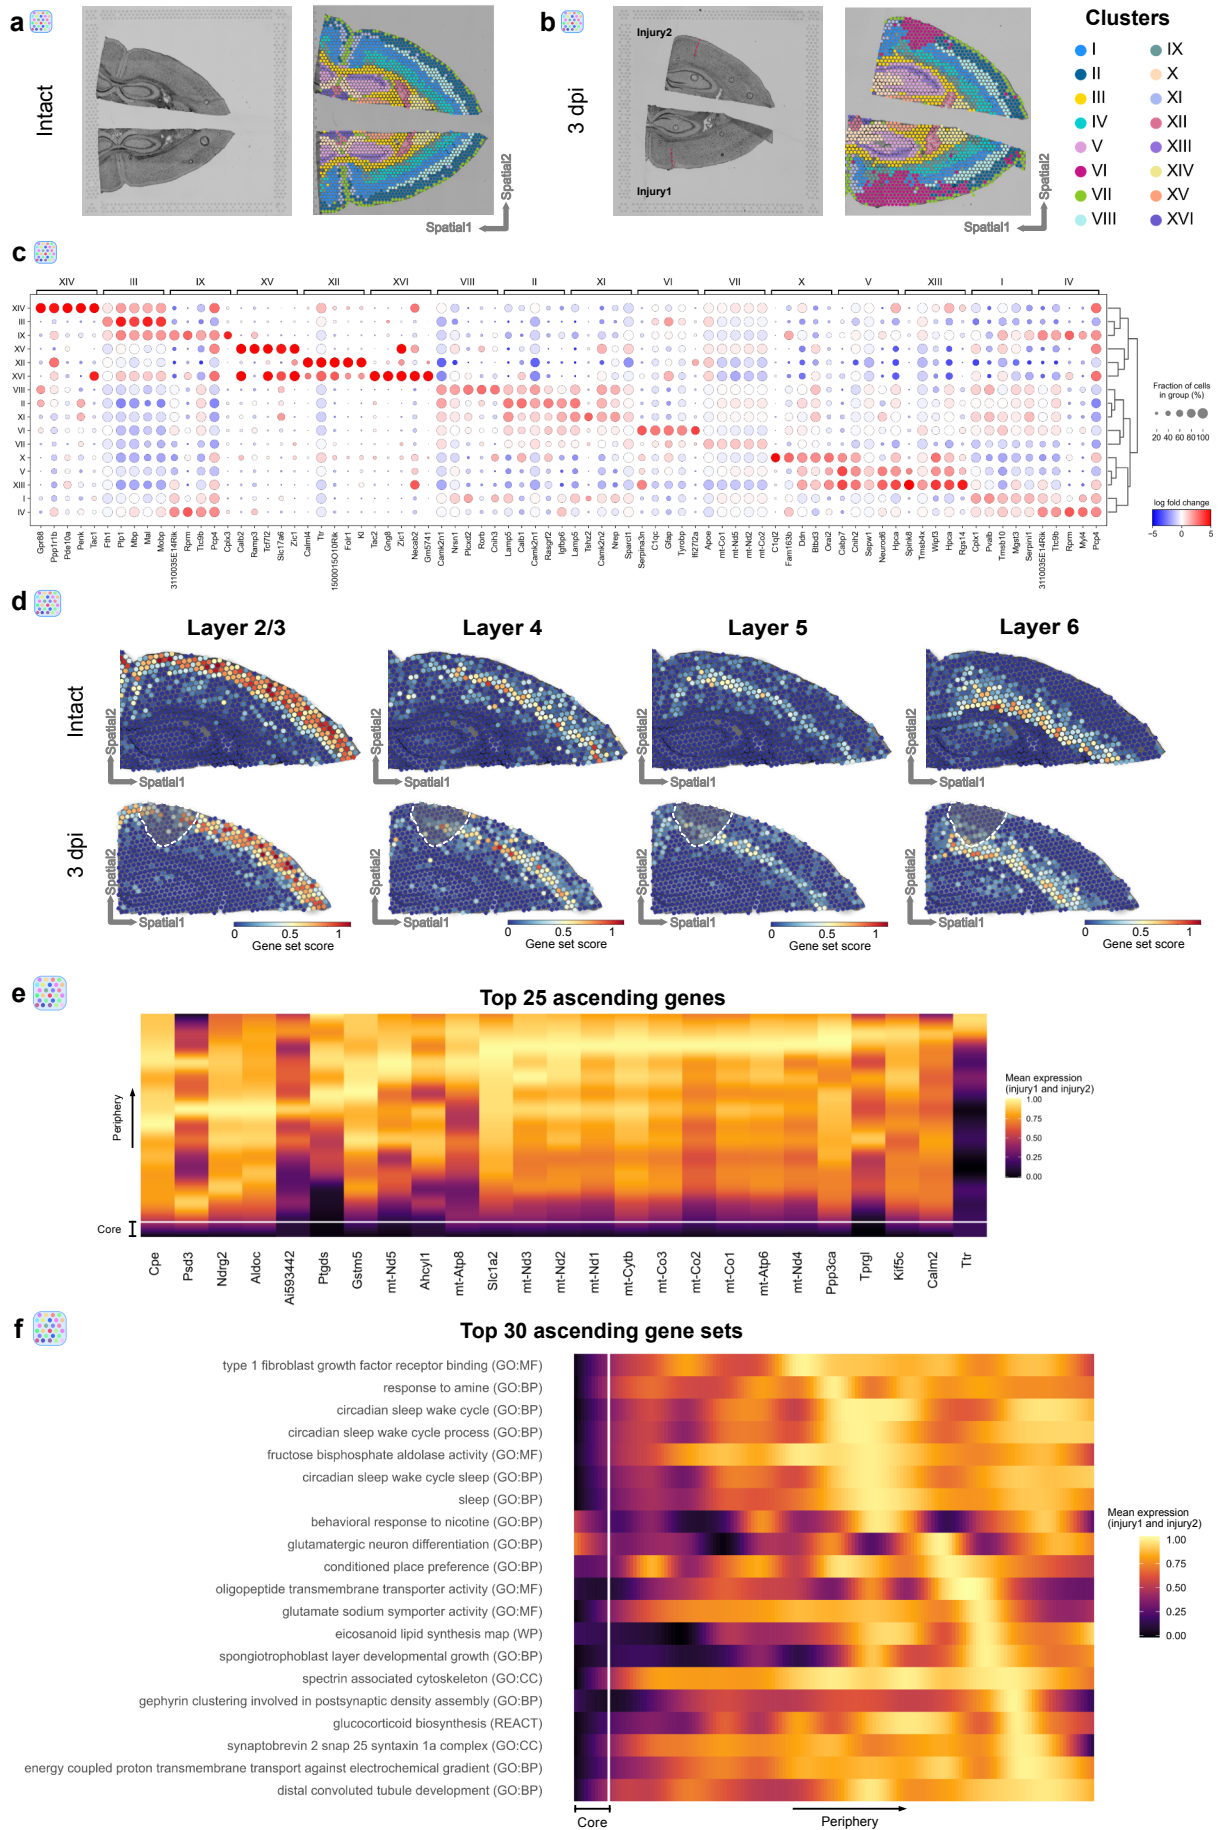

# Koupourtidou, Schwarz, et. al. ED\_Fig. 2

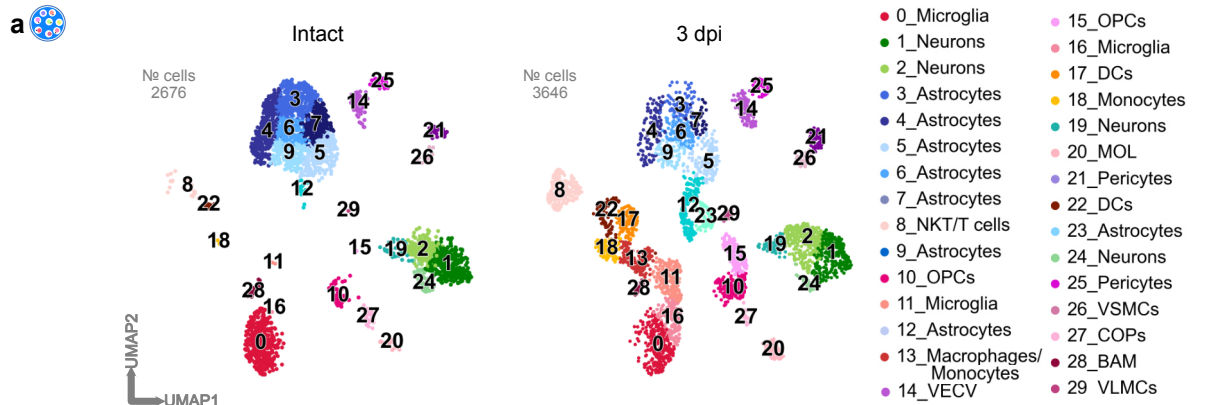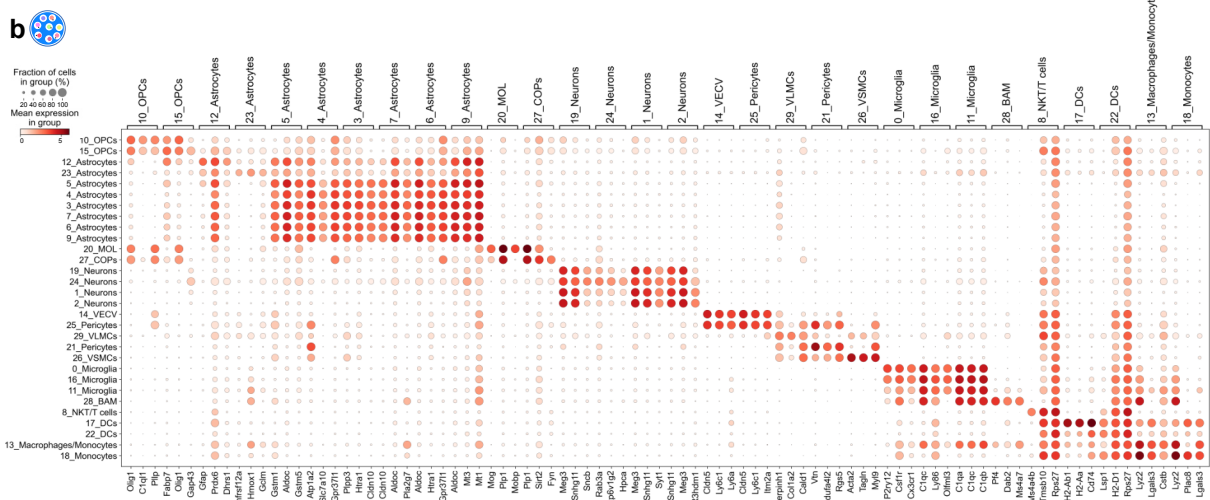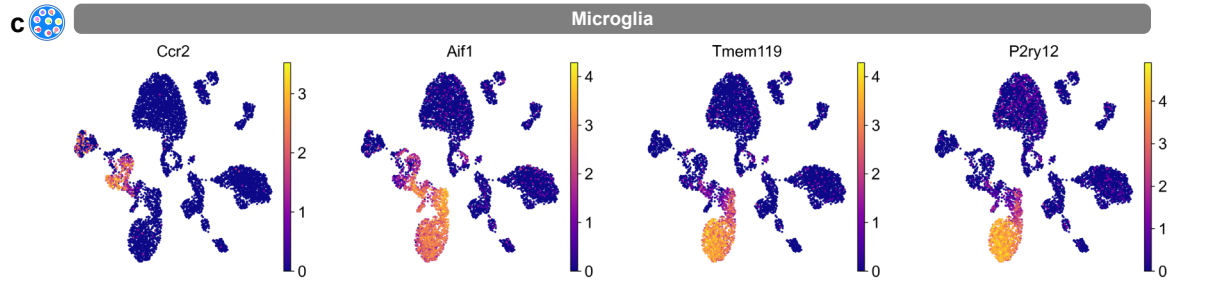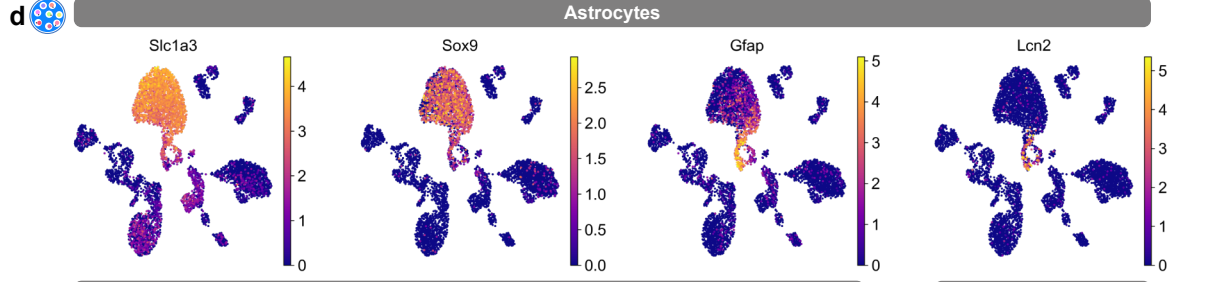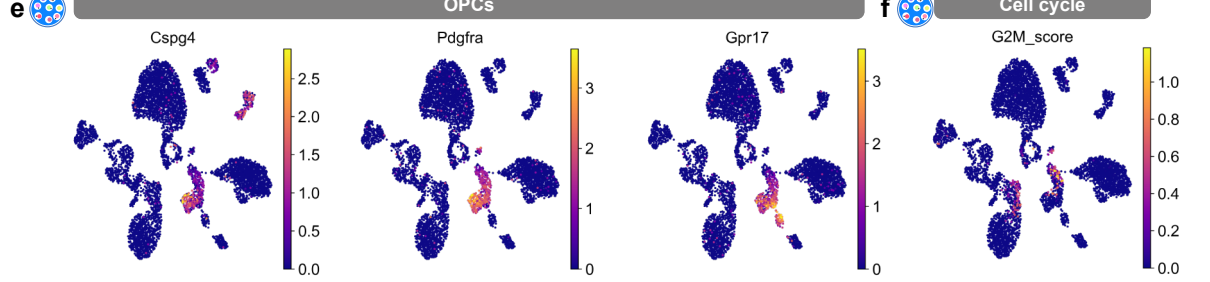

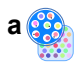

Enriched clusters

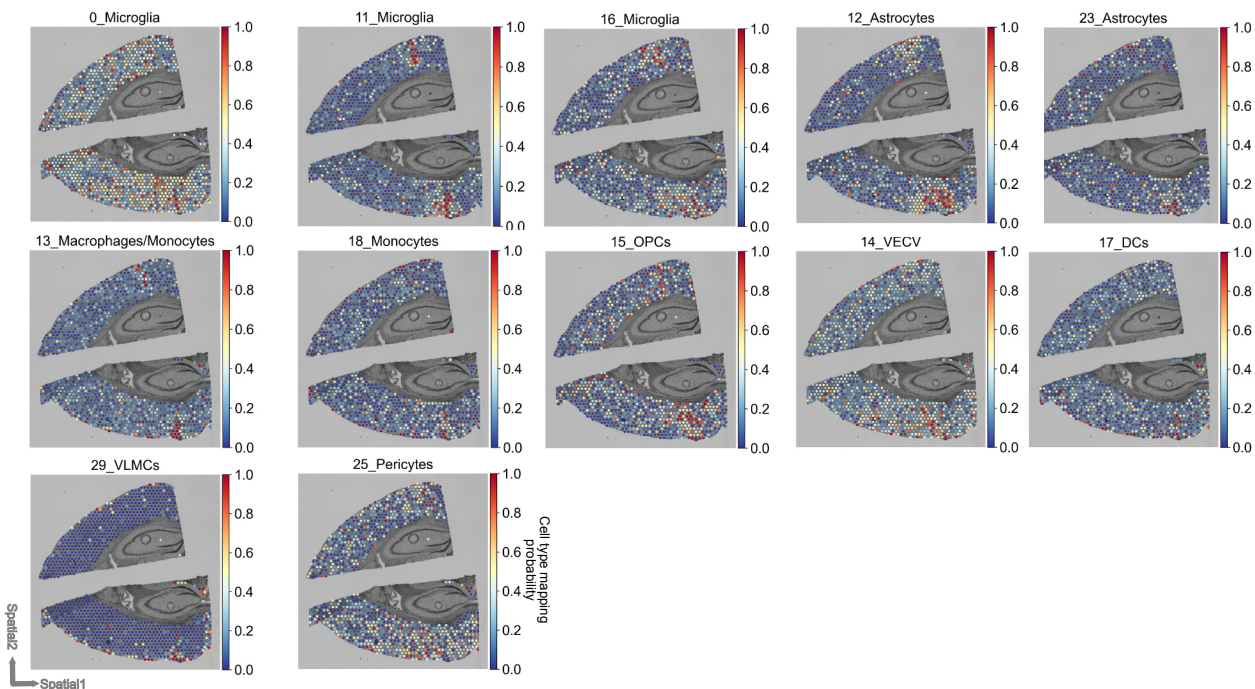

Remaining clusters

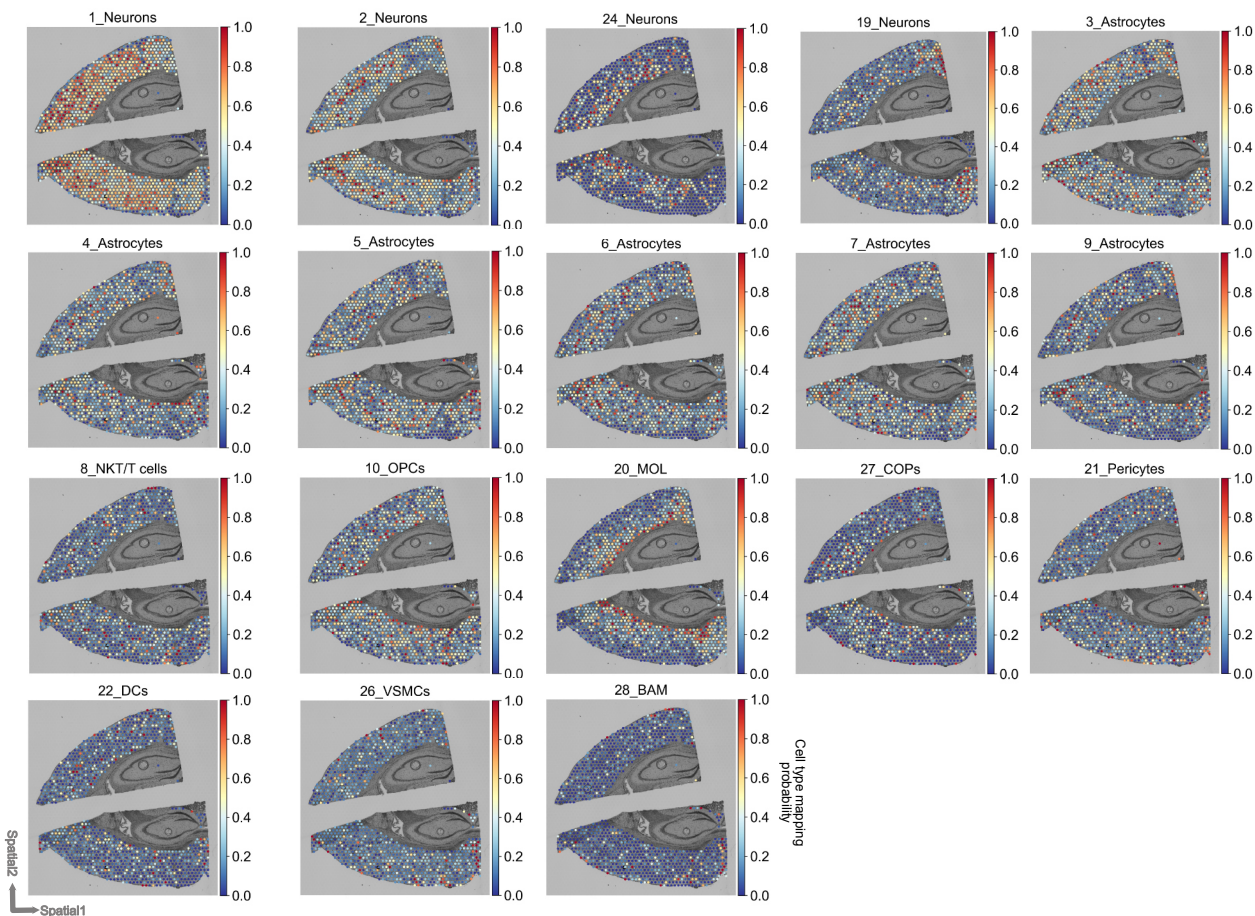

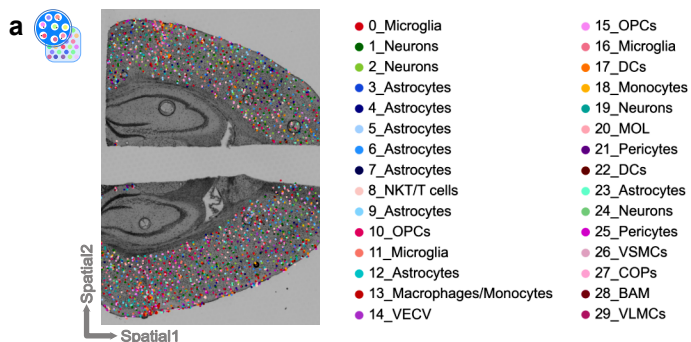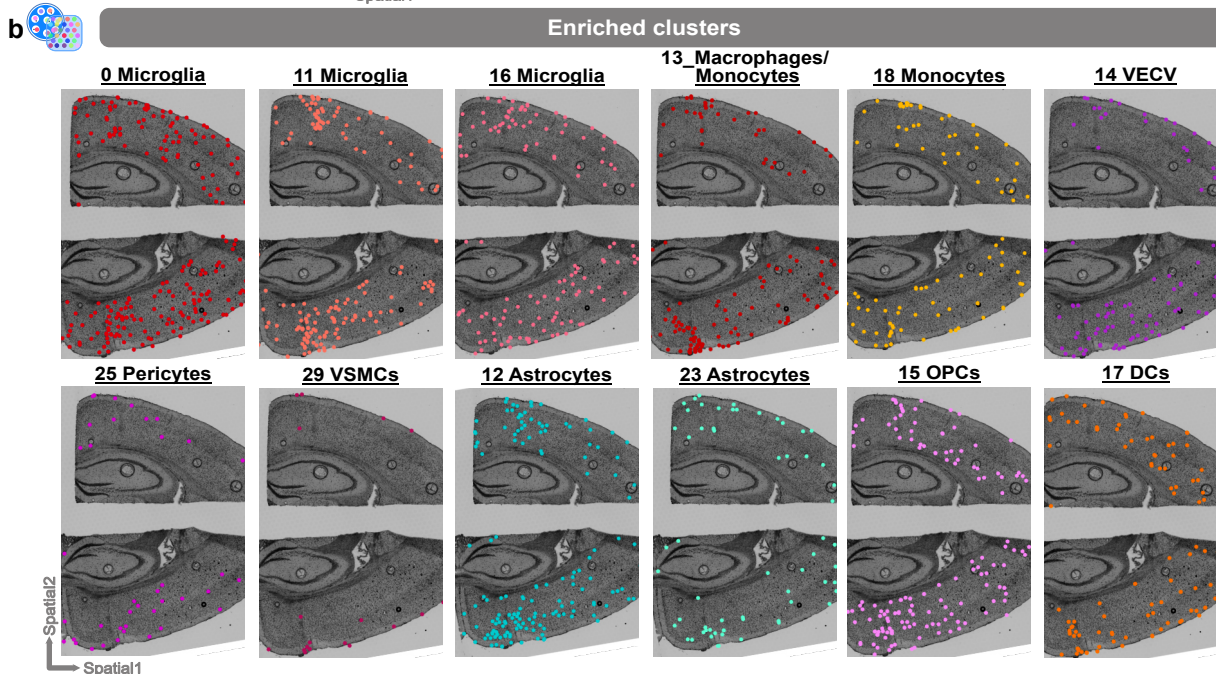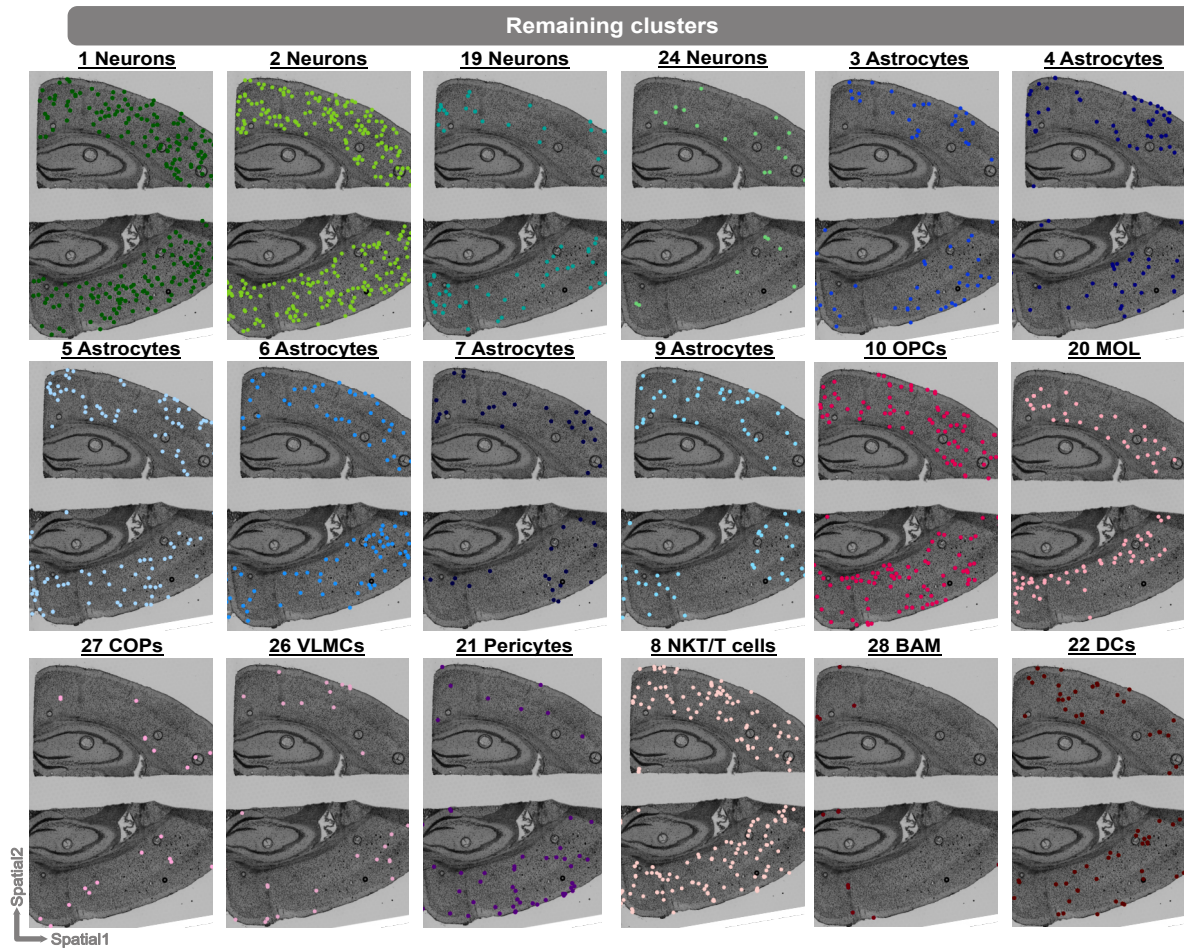

# Koupourtidou, Schwarz, et. al. ED\_Fig. 5

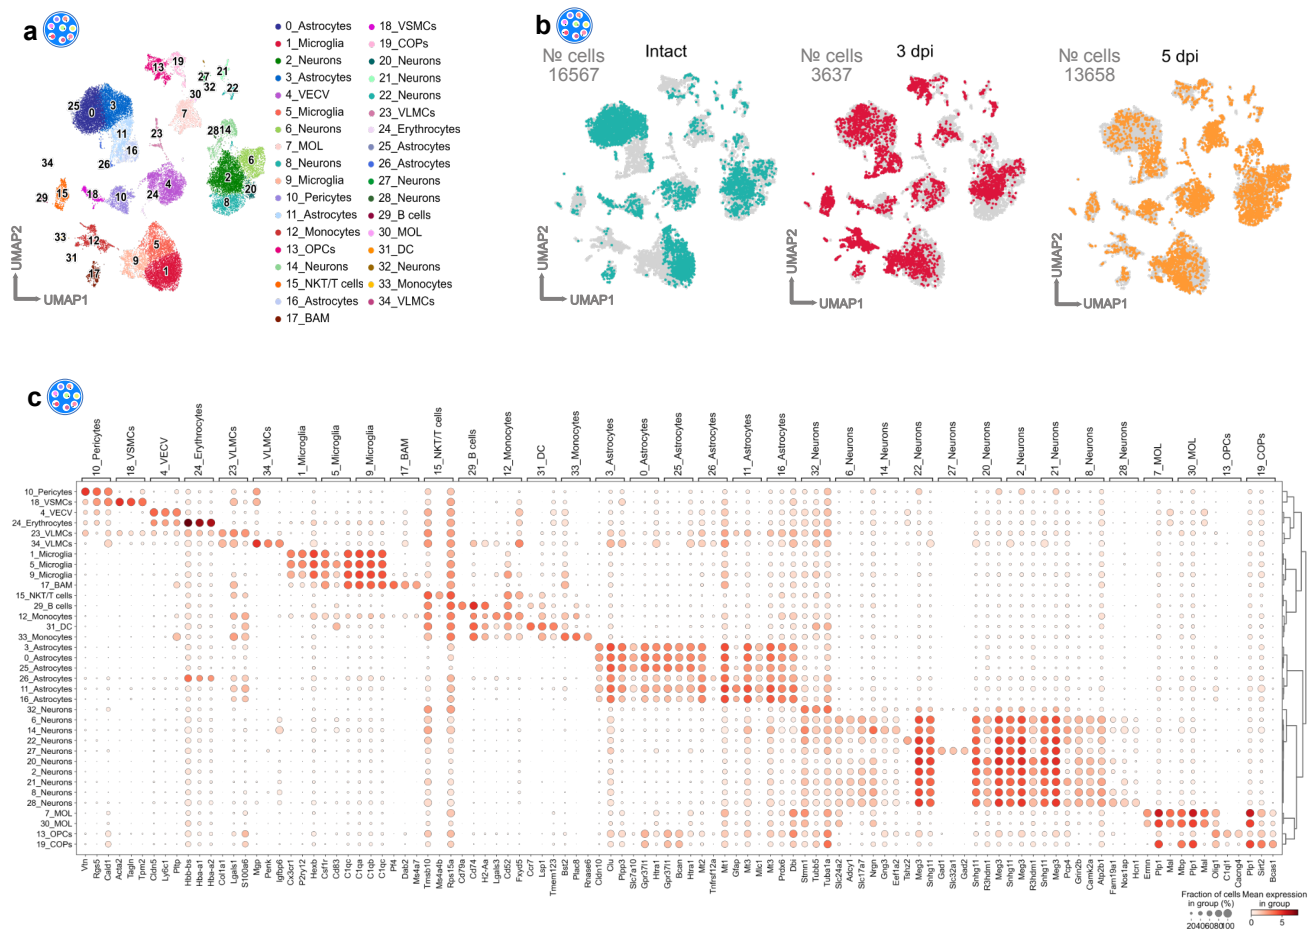

**Astrocytes**

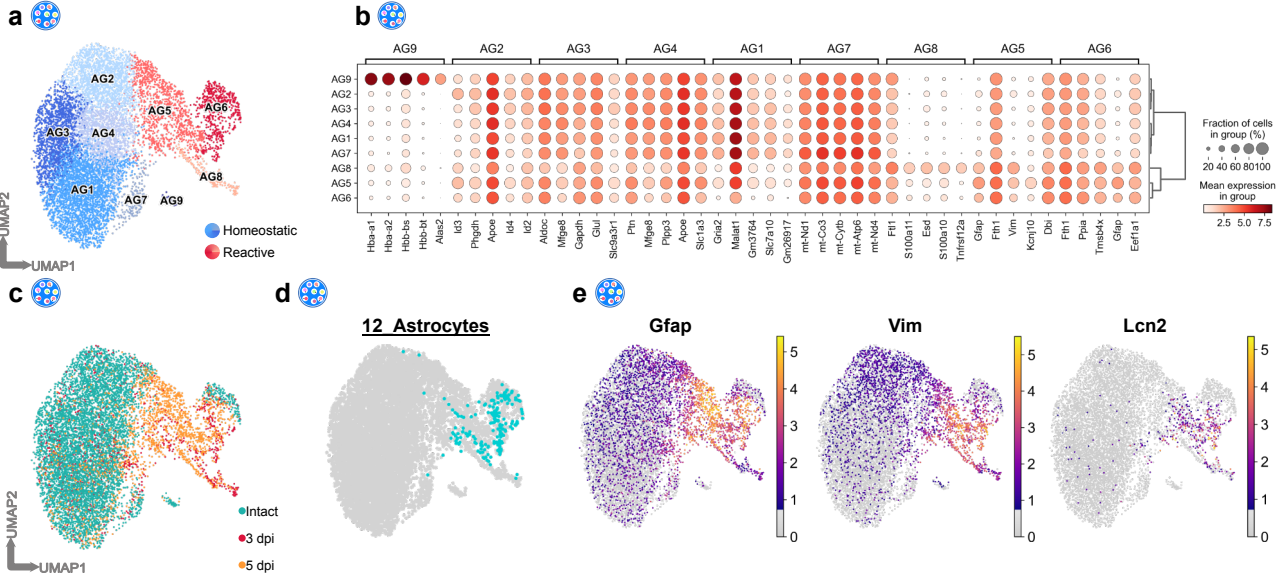

**Microglia**

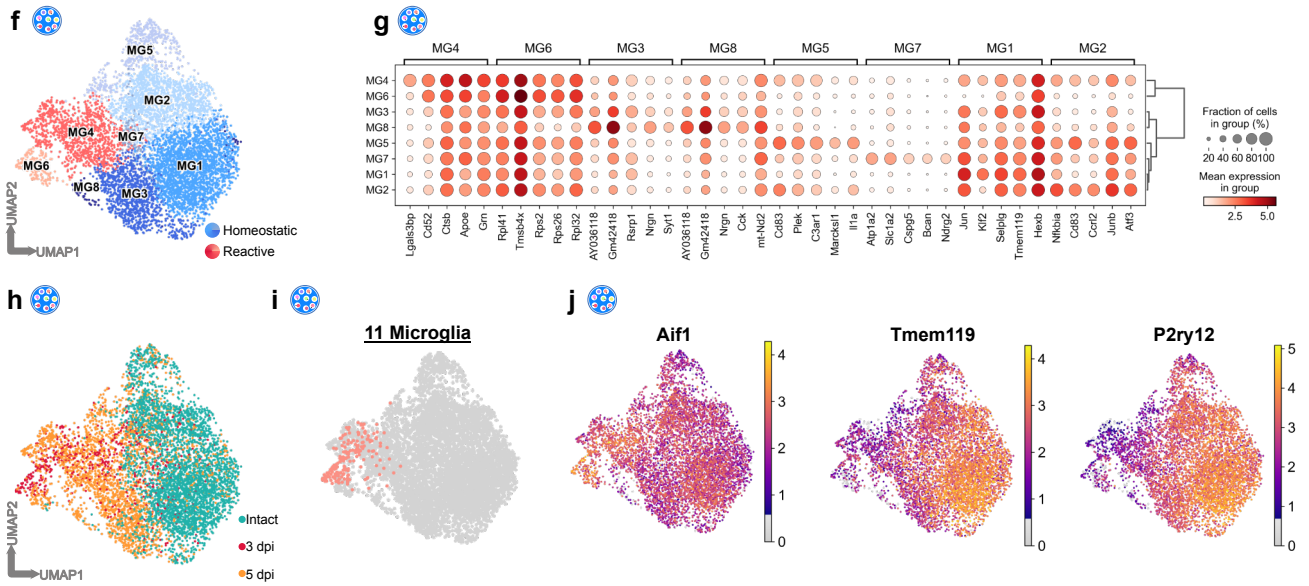

**Oligodendrocytes**

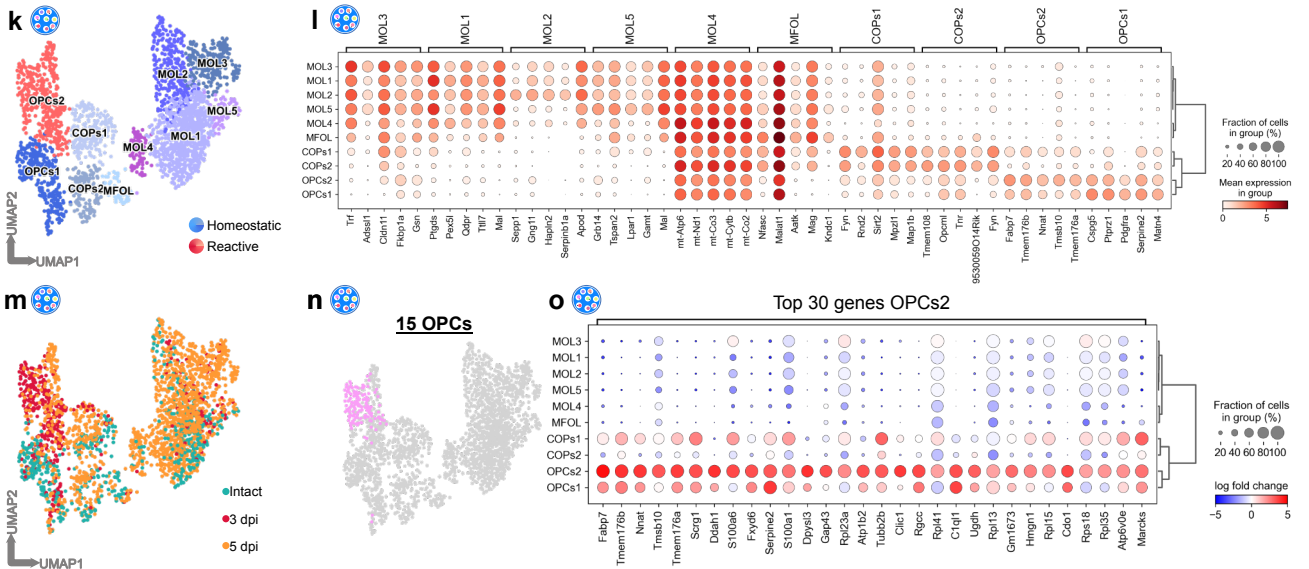

**a**

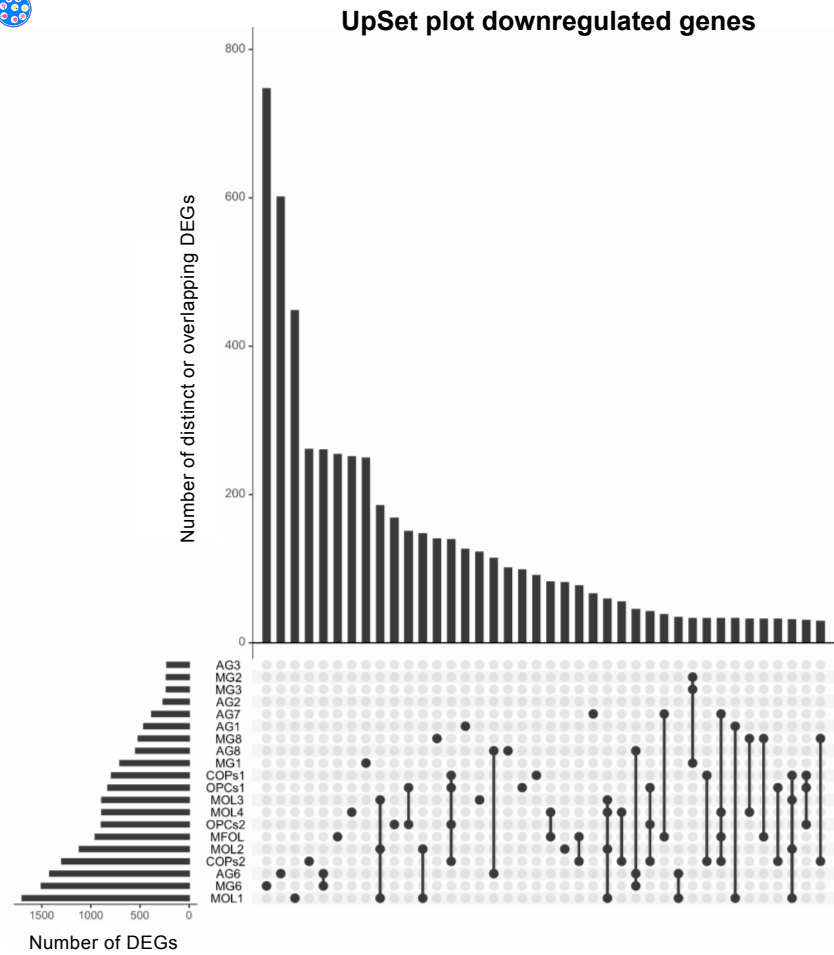

**b**

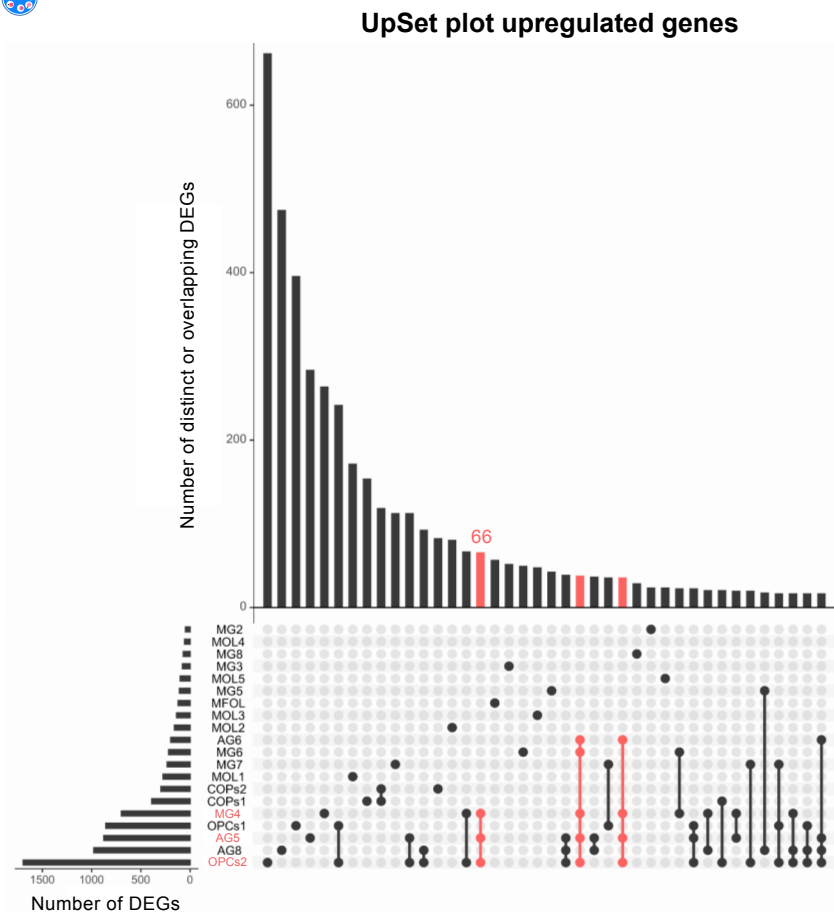

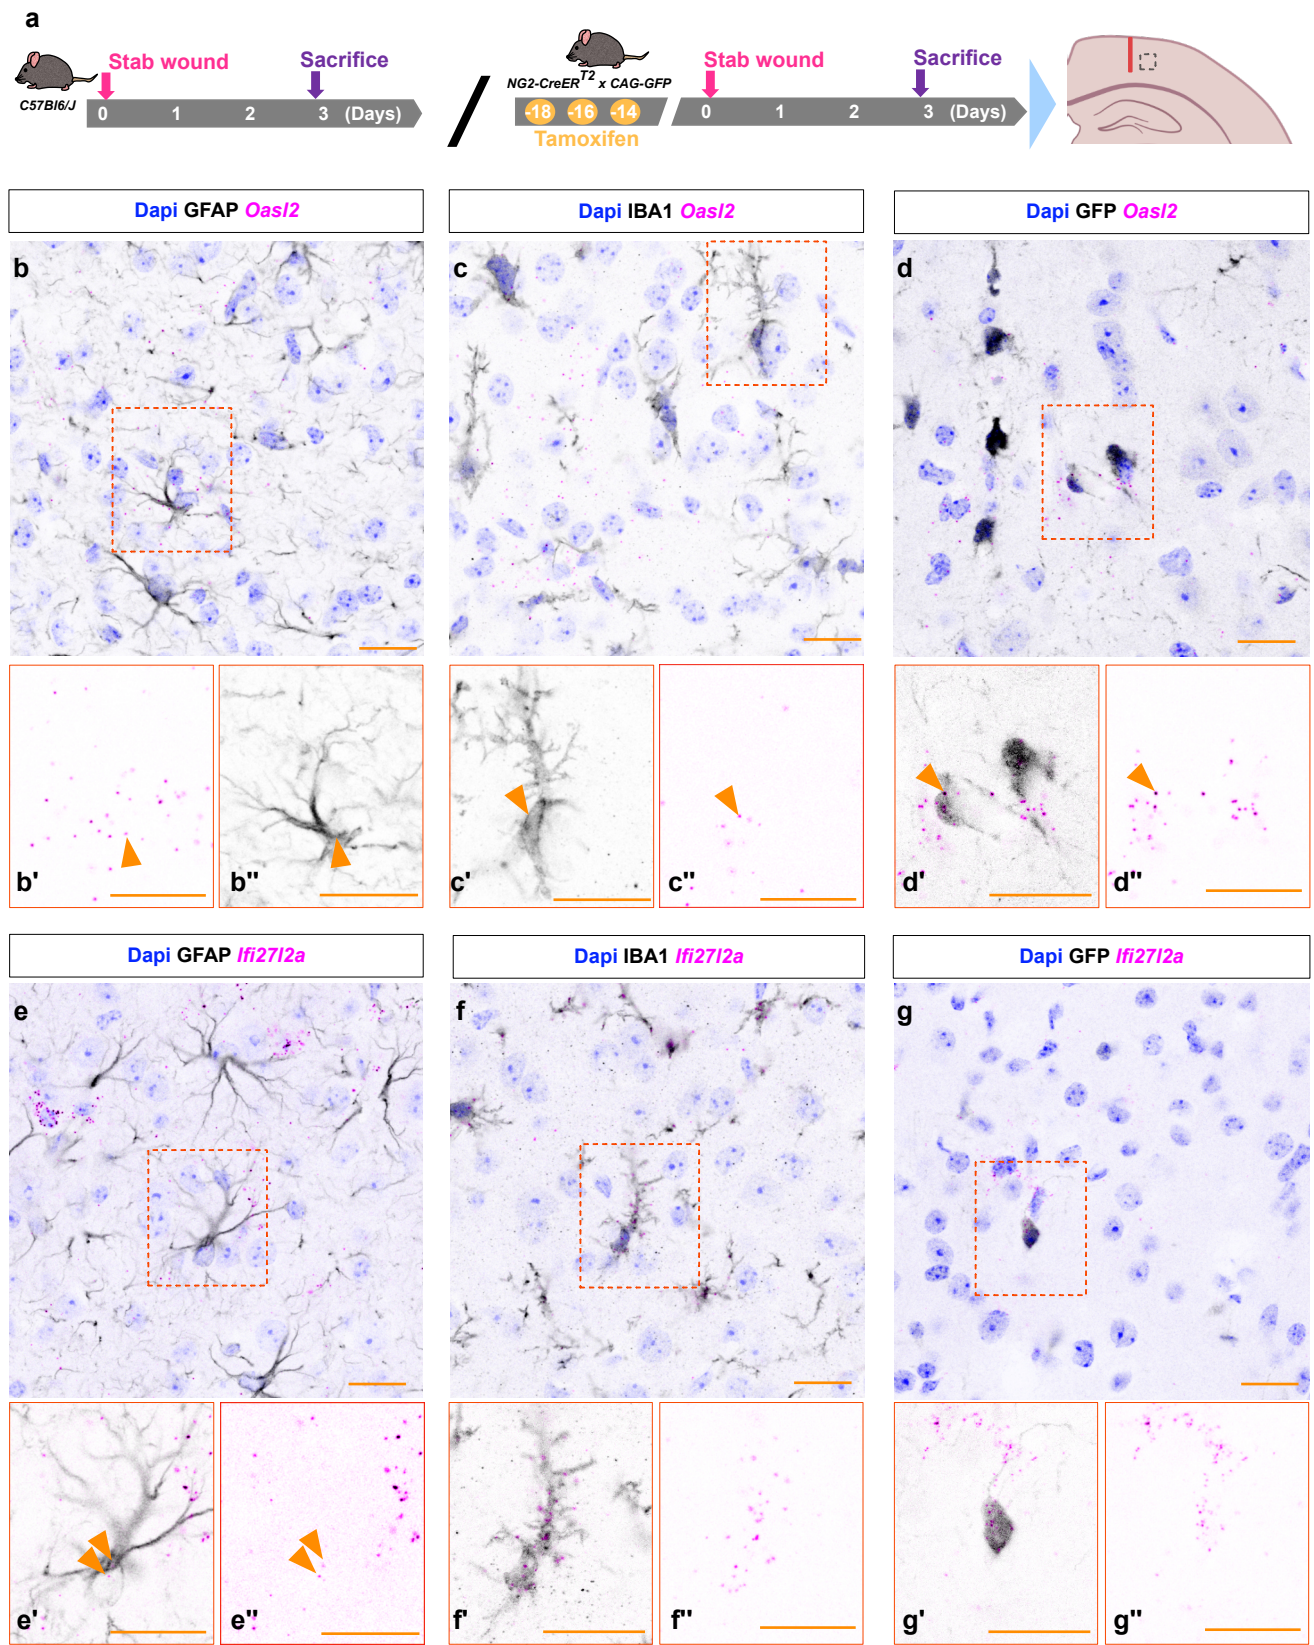



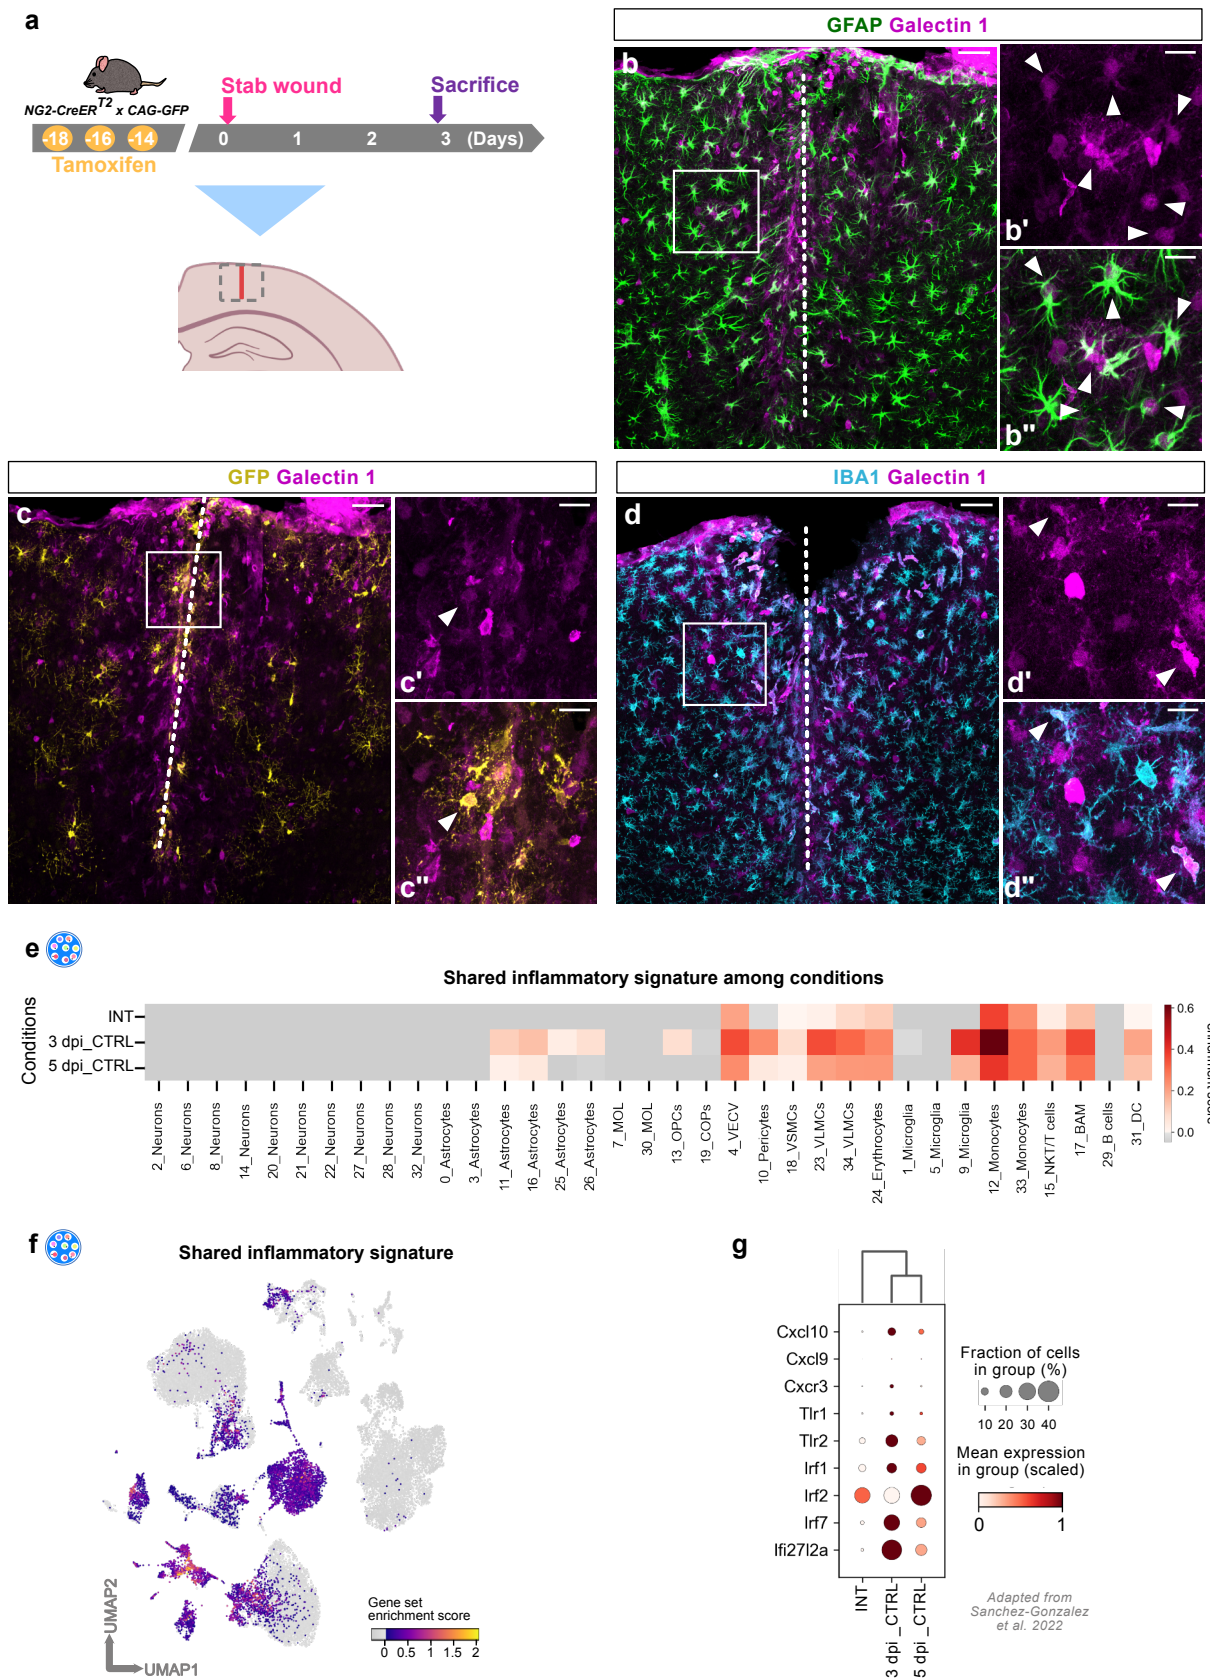

**a Shared inflammatory signature genes expressed in LPS induced reactive astrocytes**

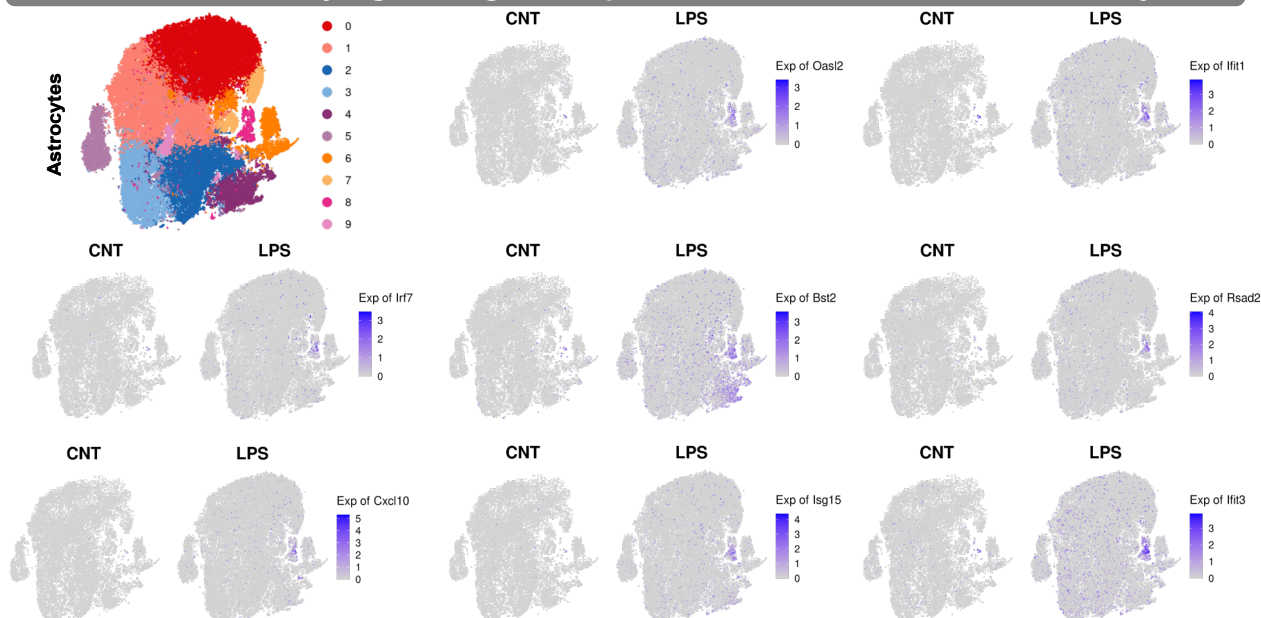

**b Shared inflammatory signature genes specific to SW-injury induced reactive astrocytes**

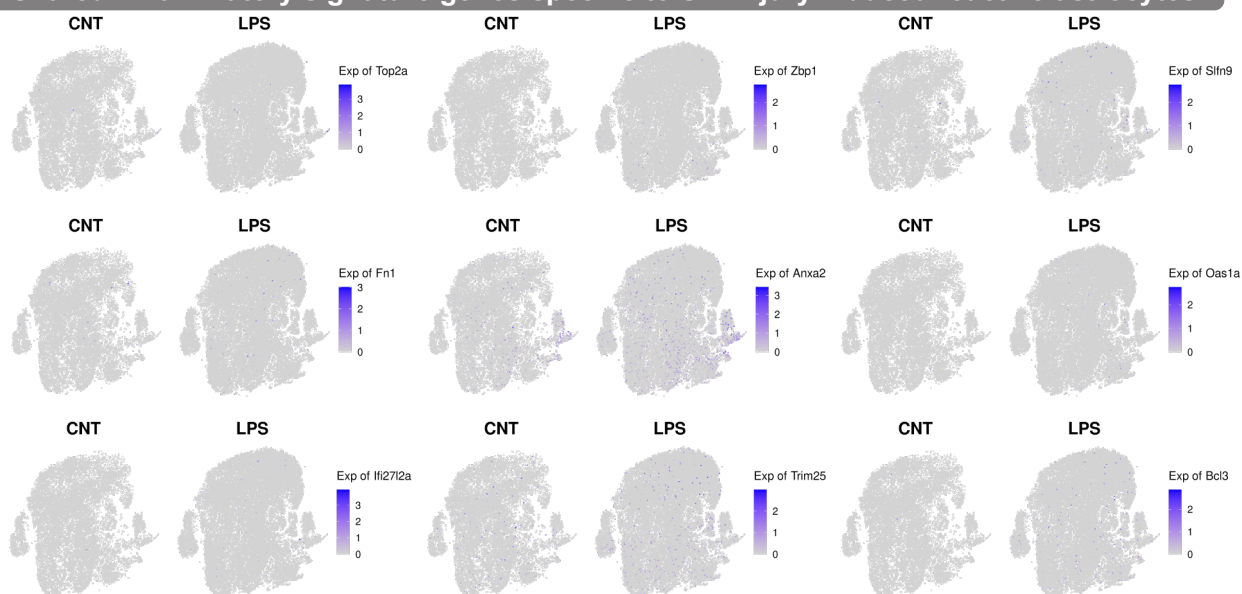

Based on Hasel et al. 2021

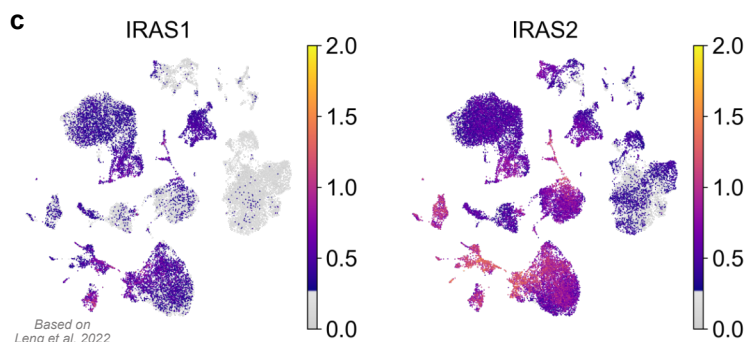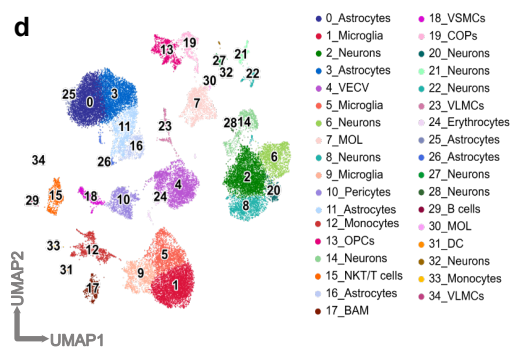

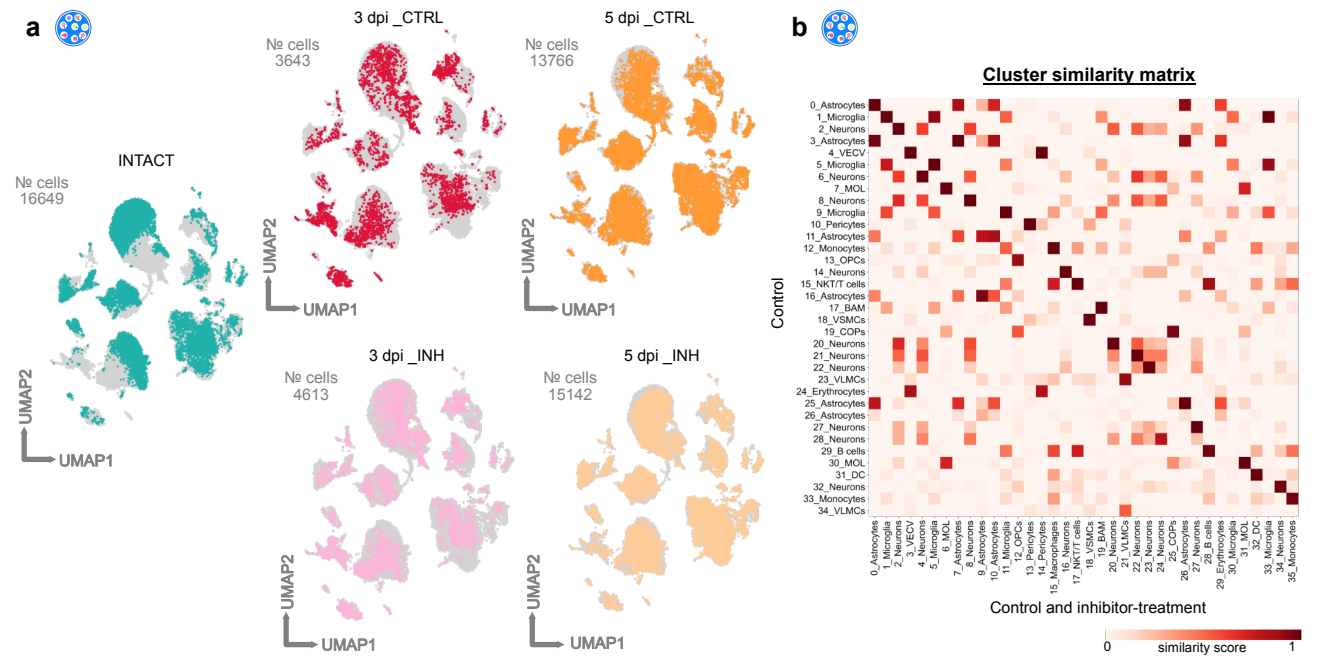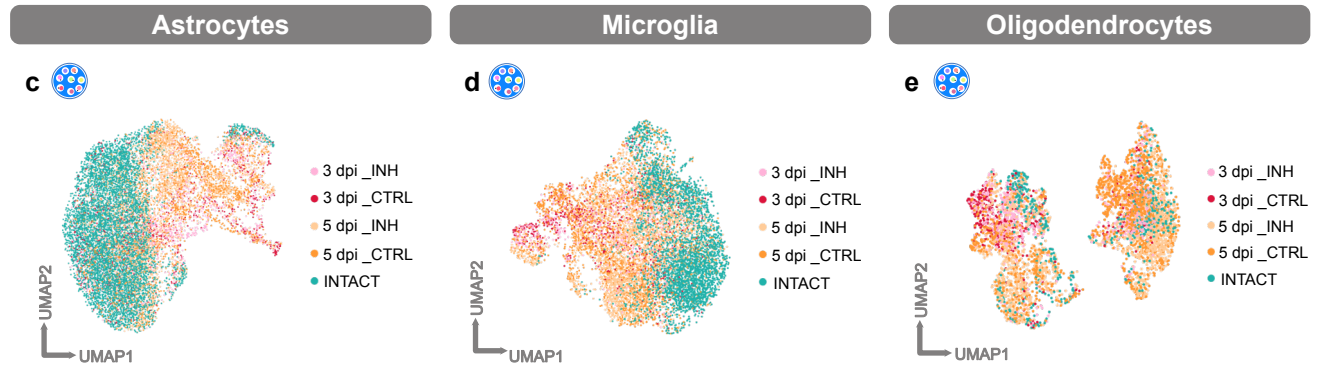

**a** 3 dpi downregulated genes after treatment

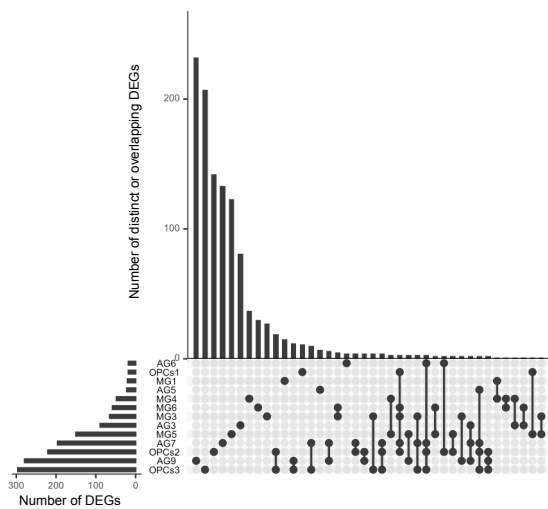

**b** 3 dpi upregulated genes after treatment

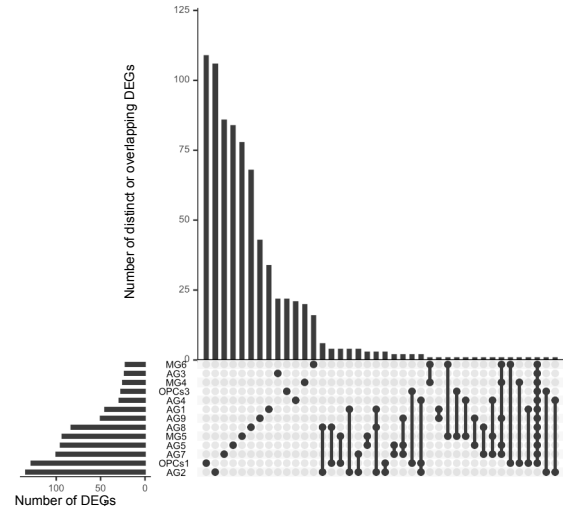

**c** 5 dpi downregulated genes after treatment

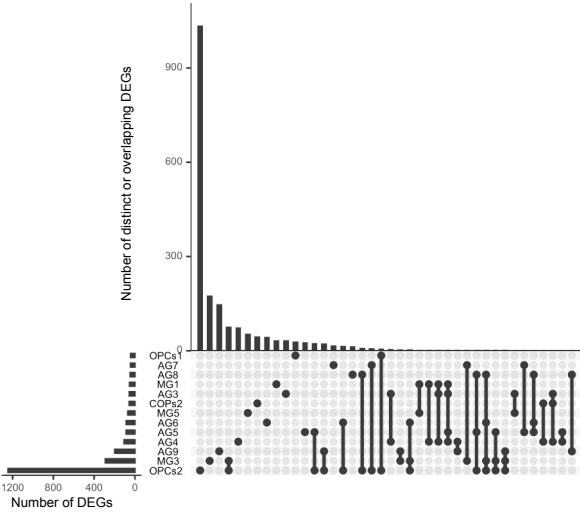

**d** 5 dpi upregulated genes after treatment

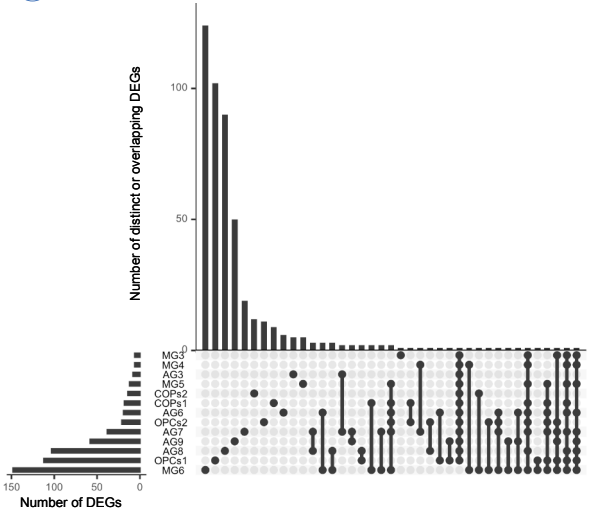

**e** Enriched biological processes of upregulated genes after treatment - 3 dpi

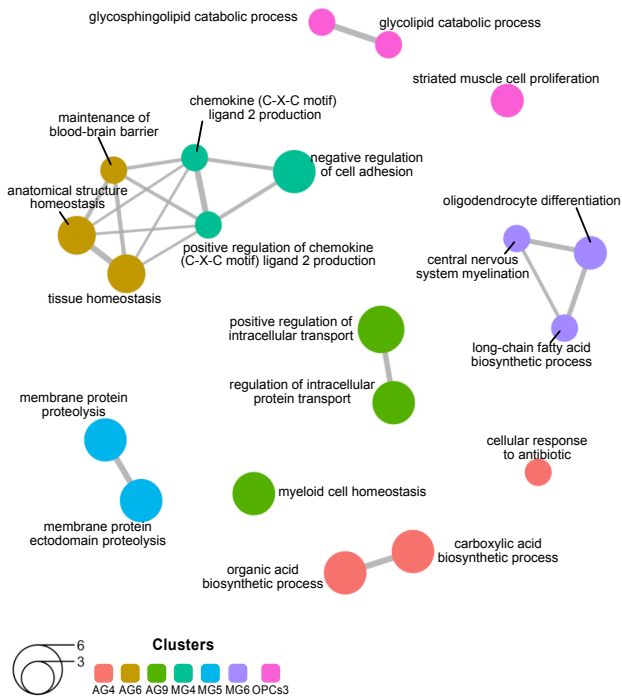

**f** Enriched biological processes of upregulated genes after treatment - 5 dpi

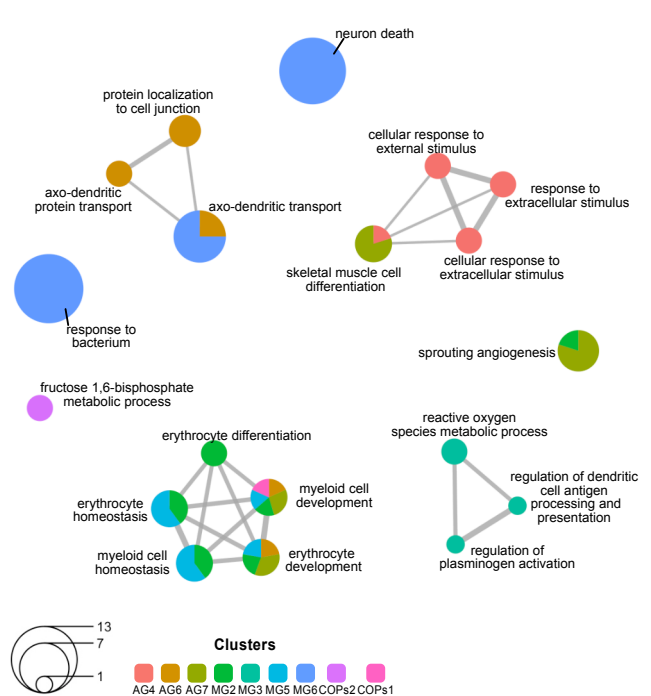

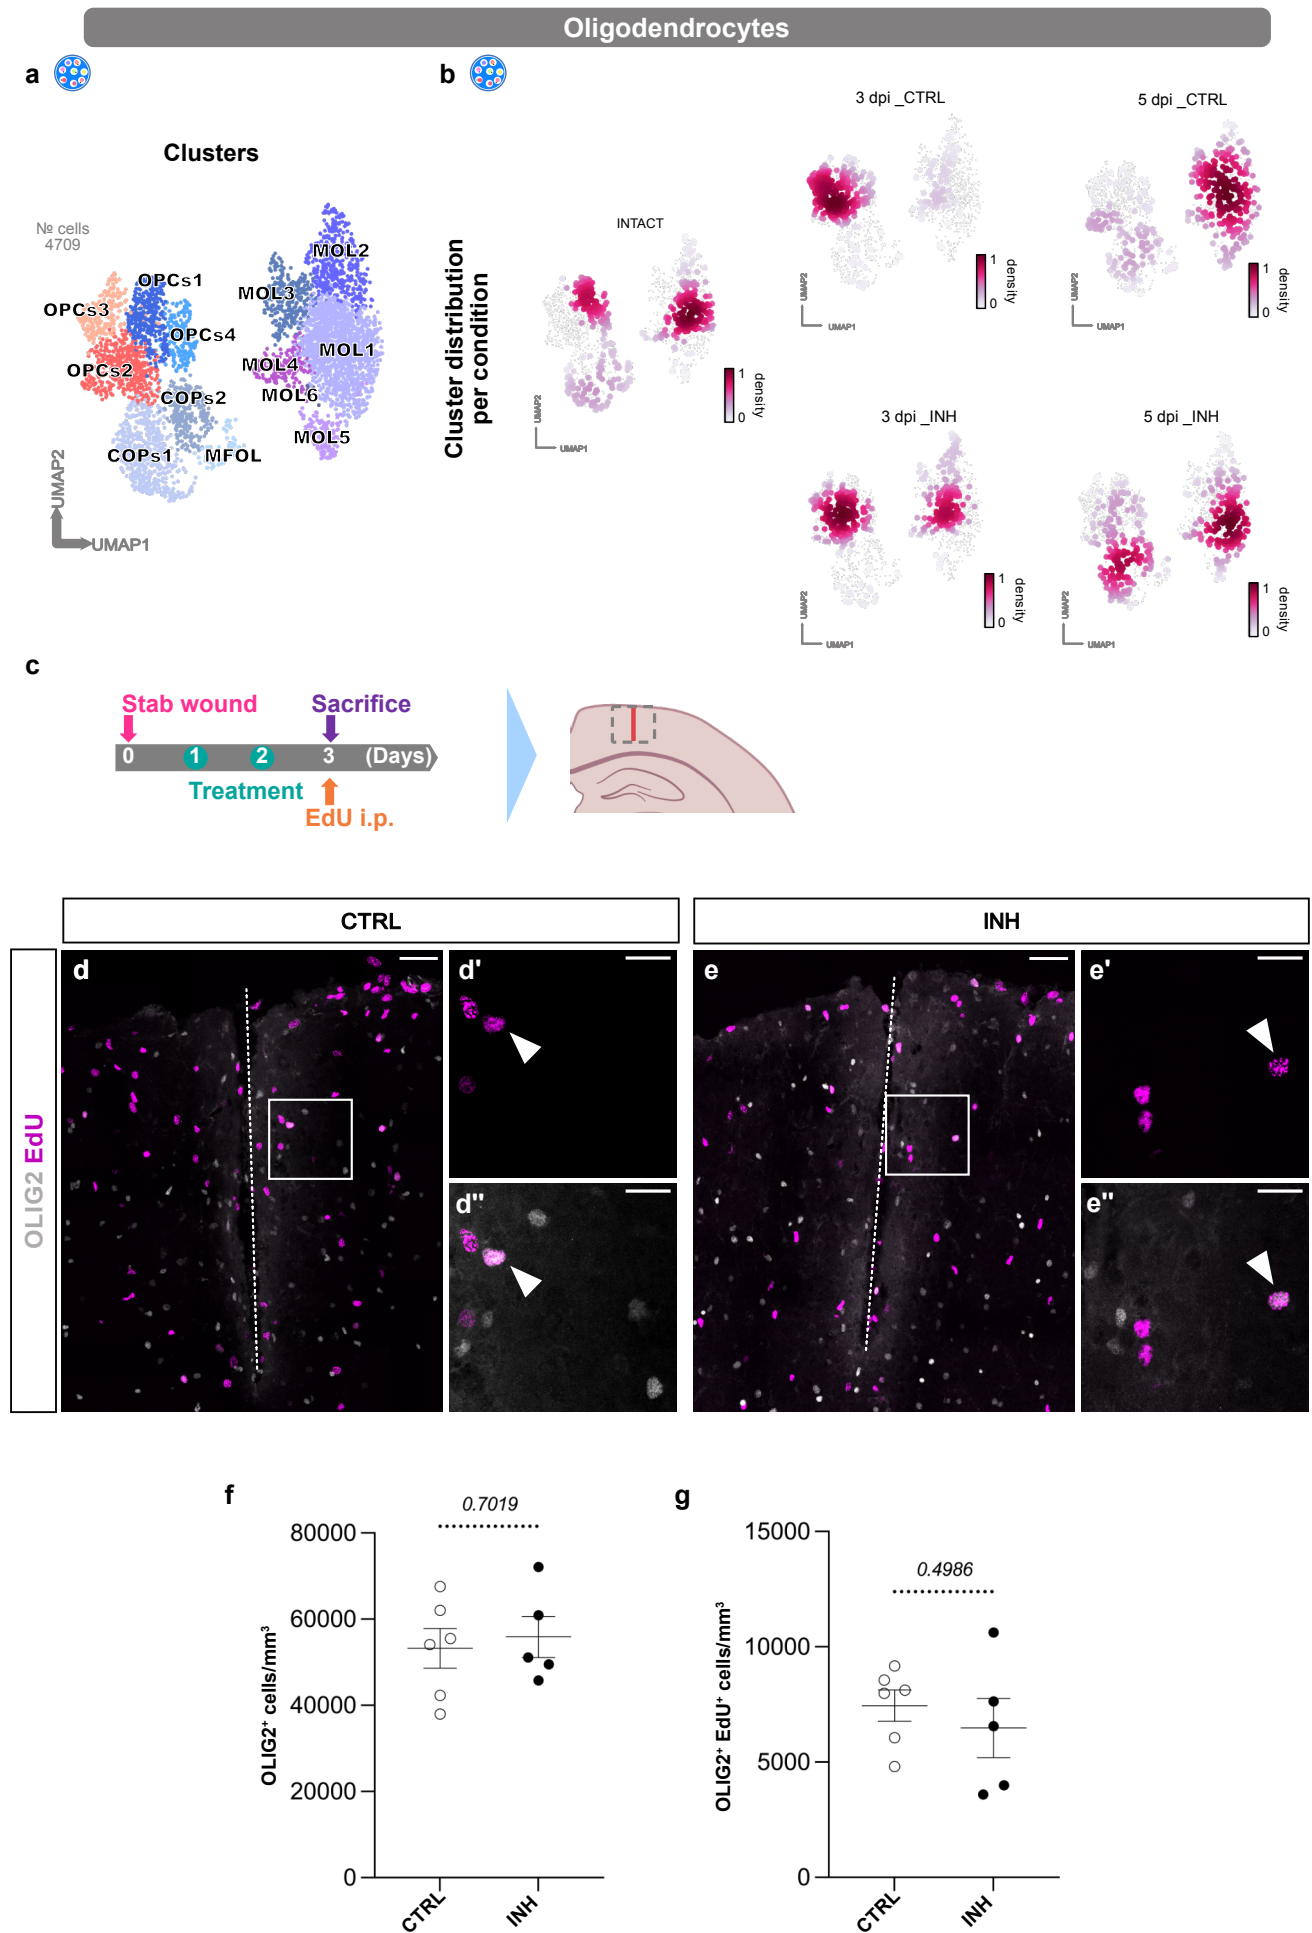

Microglia

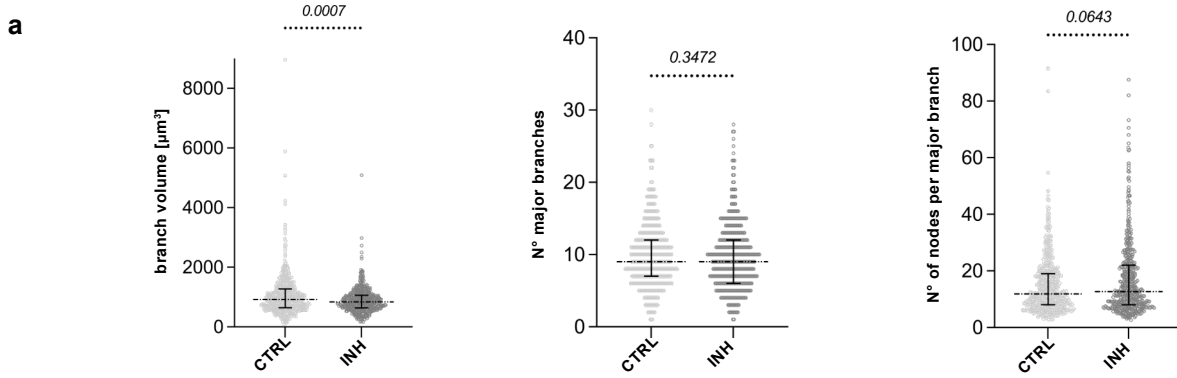

Astrocytes

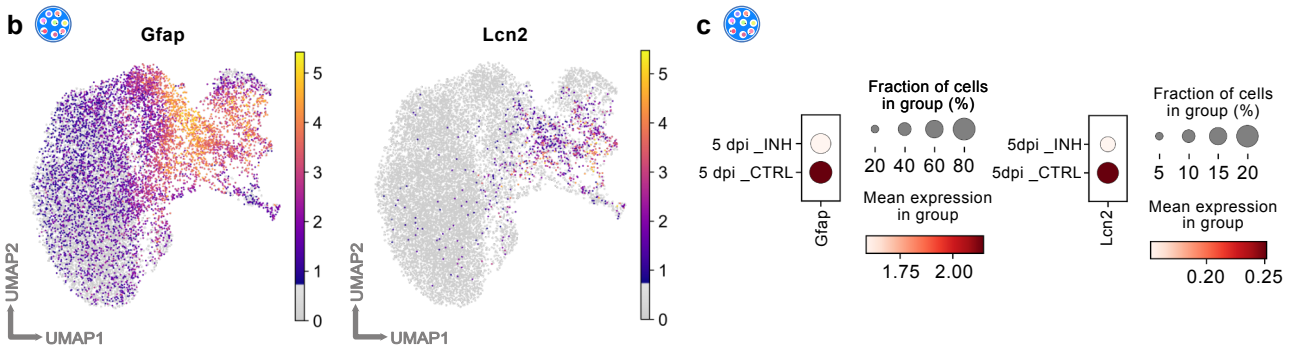

**d** Astrocyte reactivity scores

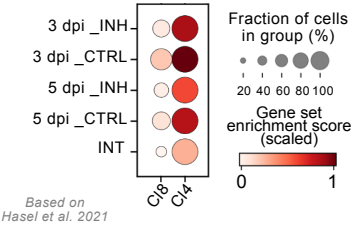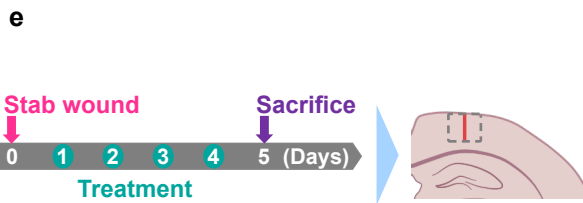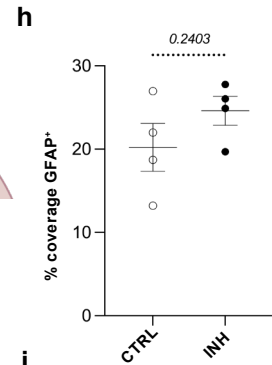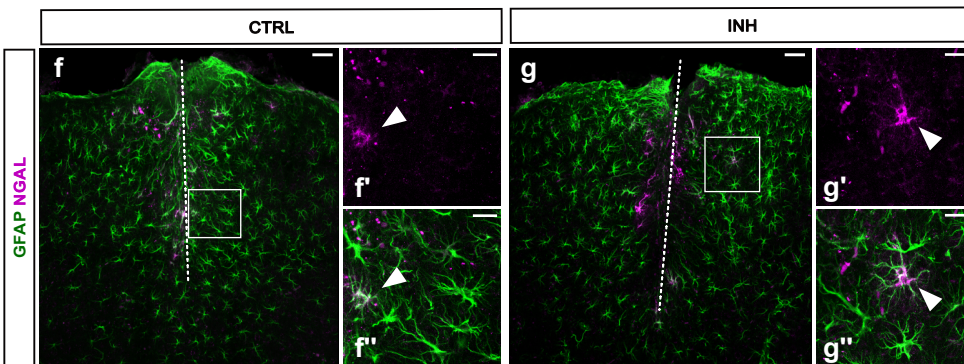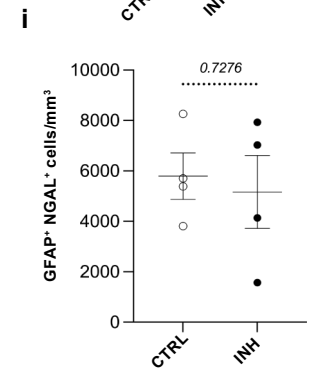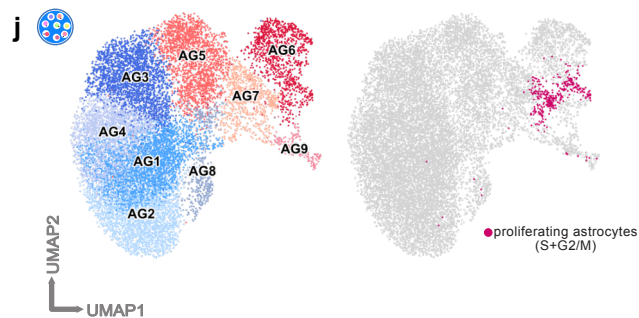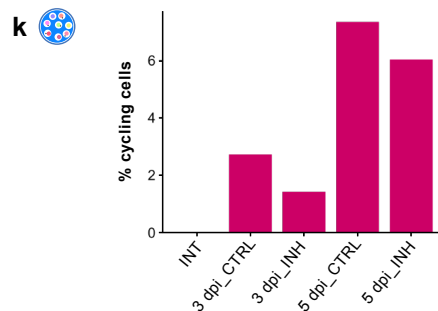

Supplement: Supplementary file [file media-1.pdf]
